# Supplementary material for: Reduction in Cold Stress in an Innovative Metabolic Cage Housing System Increases Animal Welfare in Laboratory Mice
Source: MDPI journal article supplement (doi:10.3390/ani13182866), 2023-09-09
Supplement: s1 [file s1]

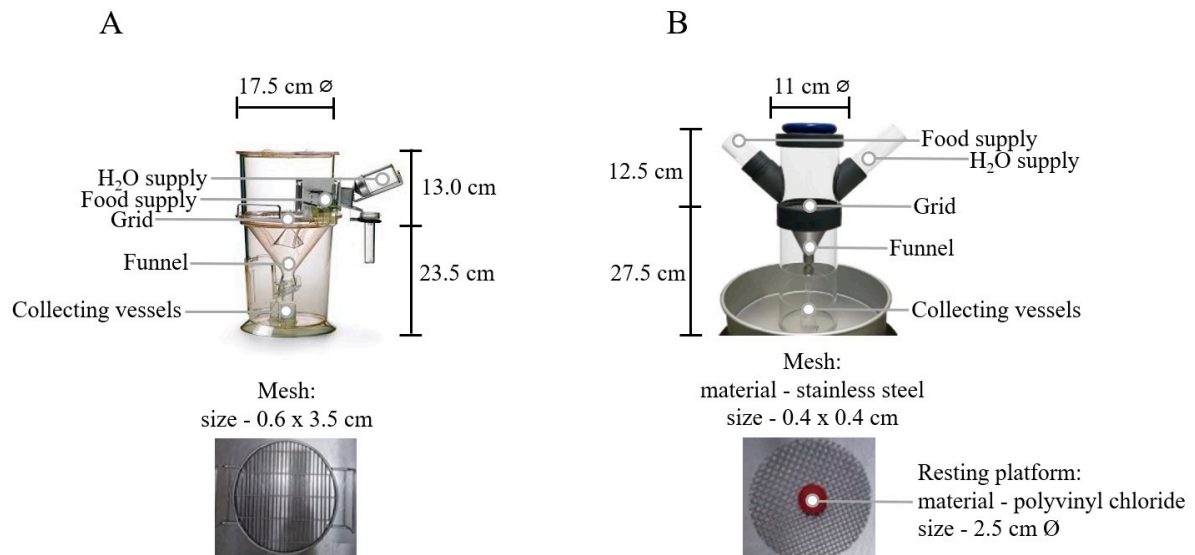

**Figure S1.** Comparison of applied metabolic cage types in the animal experiment.

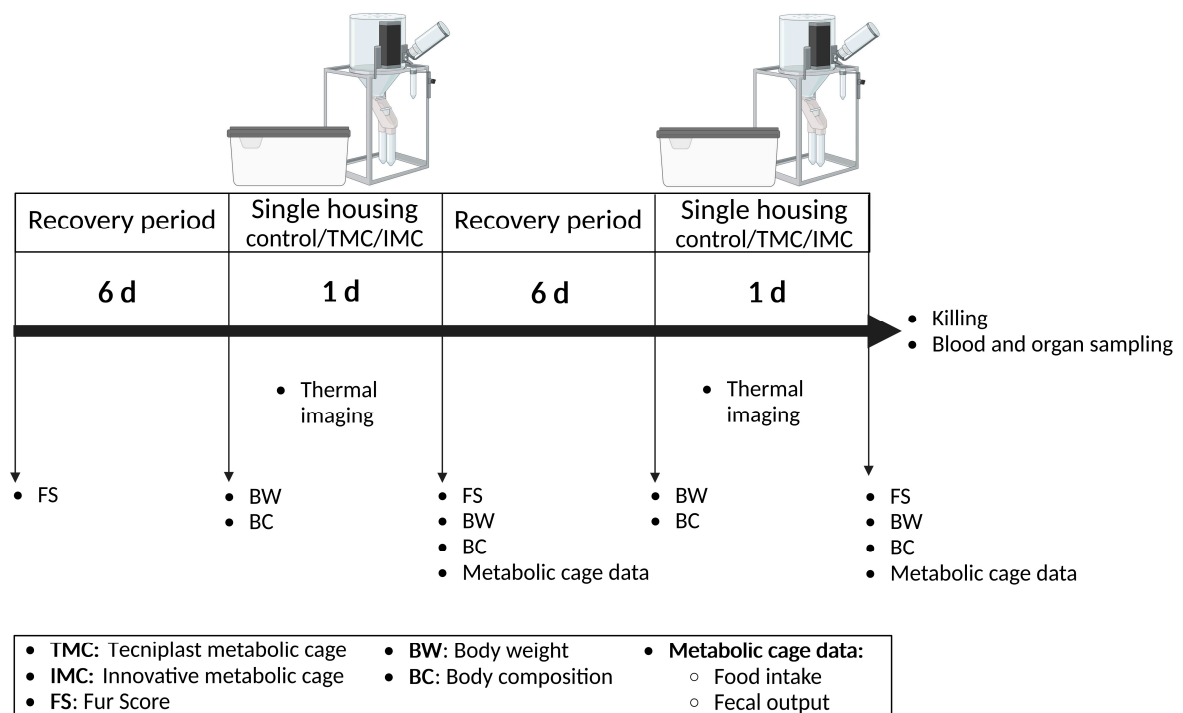

**Figure S2.** Study design of the conducted animal experiment shown as a time progression
